# Supplementary material for: A multicenter analysis of implantable monitoring device-based diagnosis of supraventricular arrhythmia post patent foramen ovale closure: the OCCL-ILR study
Source: Frontiers journal article supplement (doi:10.3389/fcvm.2025.1541923), 2025-04-04
Supplement: Table_1.pdf [file Table_1.pdf]

**Supplementary table1. Pharmacological treatment post PFO closure**

|                                                                                                            |                |
|------------------------------------------------------------------------------------------------------------|----------------|
| Baseline anti-thrombotic treatment immediately post PFO closure                                            |                |
| - Aspirin + clopidogrel                                                                                    | 58/59 (98.3%)  |
| - Clopidogrel + OAC                                                                                        | 1/59 (1.7%)    |
| Switch to OAC or DOAC after diagnosis of supraventricular arrhythmia                                       | 10/18 (55.6%)  |
| Anti-thrombotic treatment at last clinical follow-up                                                       |                |
| - Aspirin                                                                                                  | 27/59 (45.76%) |
| - Clopidogrel                                                                                              | 20/59 (33.91%) |
| - Aspirin + clopidogrel                                                                                    | 5/59 (8.47%)   |
| - DOAC                                                                                                     | 5/59 (8.47%)   |
| - OAC                                                                                                      | 0/59 (0%)      |
| - None                                                                                                     | 2/59 (3.39%)   |
| Baseline anti-arrhythmic treatment immediately post PFO closure                                            |                |
| - Betablockers                                                                                             | 8/59 (13.56%)  |
| - Amiodarone                                                                                               | 1/59 (1.69%)   |
| - None                                                                                                     | 50/59 (84.75%) |
| Start (or switch) of anti-arrhythmic treatment during follow-up                                            |                |
| - Patients with supraventricular arrhythmia post PFO closure                                               | 6/18 (33.3%)   |
| - Patients without supraventricular arrhythmia post PFO closure                                            | 1/41 (2.44%)   |
| New anti-arrhythmic drug introduced during follow-up                                                       |                |
| - Betablockers                                                                                             | 2/7 (28.57%)   |
| - Sotalol                                                                                                  | 4/7 (57.14%)   |
| - Amiodarone                                                                                               | 1/7 (14.29%)   |
| Values are n (%).<br>PFO: patent foramen ovale<br>DOAC: direct anticoagulants<br>OAC: oral anticoagulation |                |
